# Supplementary material for: Exosomes separated based on the “STOP” criteria for tumor-targeted drug delivery
Source: Royal Society of Chemistry journal article supplement (doi:10.1039/c8tb00355f), 2018-01-01
Supplement: c8tb00355f1.pdf [file c8tb00355f1.pdf]

## Supporting Information

### Exosomes separated based on the "STOP" criteria for tumor-targeted drug delivery

Hongzhao Qi,<sup>1,2,†</sup> Lijun Yang<sup>3,†</sup> Xueping Li,<sup>1</sup> Qi Zhan,<sup>1</sup> Donglin Han,<sup>1</sup> Jin Zhao,<sup>1,\*</sup>

Xin Hou,<sup>1,\*</sup> Xubo Yuan,<sup>1,\*</sup>

1 Tianjin Key Laboratory of Composite and Functional Materials, School of Materials  
Science and Engineering, Tianjin University, Tianjin 300072, China

2 Institute for Translational Medicine, Qingdao University, Qingdao 266021, China

3 School of Pharmaceutical Science and Technology, Tianjin University, Tianjin  
300072, China

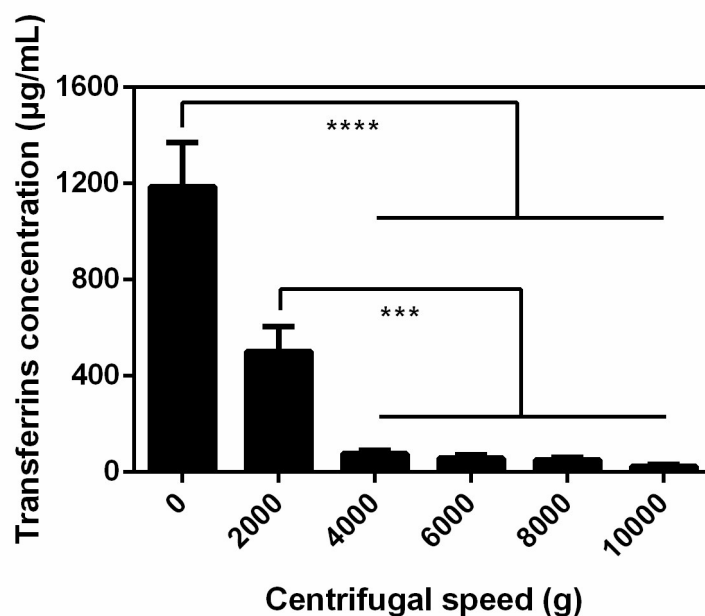

Figure S1. A) The influence of centrifugal speed on the concentration of free serum transferrins; B) significance levels are shown as \*\*\* $p < 0.001$  and \*\*\*\* $p < 0.0001$ .

**Table S1.** The influence of centrifugal speed on proteins recovery.

| Centrifugal speed (g) | Proteins concentration of filtrate (mg/mL) | Proteins concentration of retentate (mg/mL) | Protein yield (%) |
|-----------------------|--------------------------------------------|---------------------------------------------|-------------------|
| 0                     | /                                          | $82.53 \pm 3.81$                            | 100               |
| 4000                  | $60.73 \pm 4.32$                           | $15.41 \pm 2.64$                            | ~92               |
| 6000                  | $61.63 \pm 3.90$                           | $11.42 \pm 4.26$                            | ~88               |
| 8000                  | $60.52 \pm 1.53$                           | $9.32 \pm 3.63$                             | ~84               |
| 10000                 | $55.24 \pm 5.24$                           | $7.35 \pm 1.03$                             | ~75               |

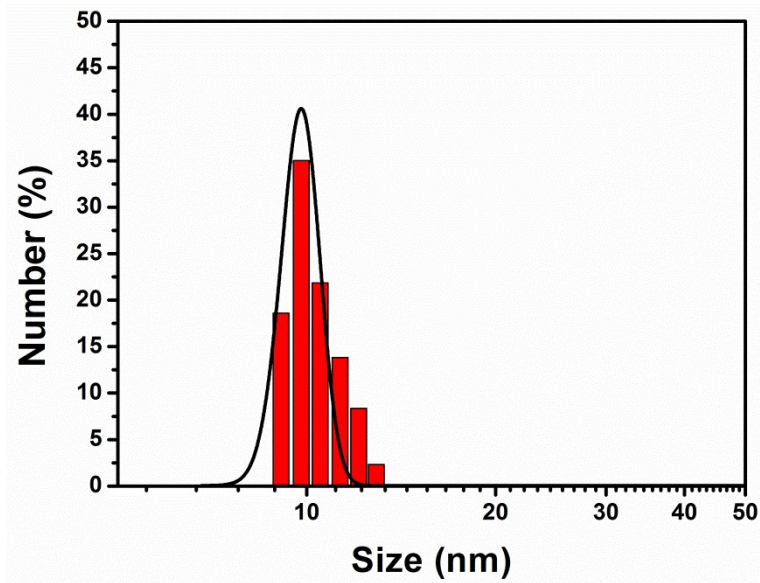

Figure S2. The size distribution of SPMNS.

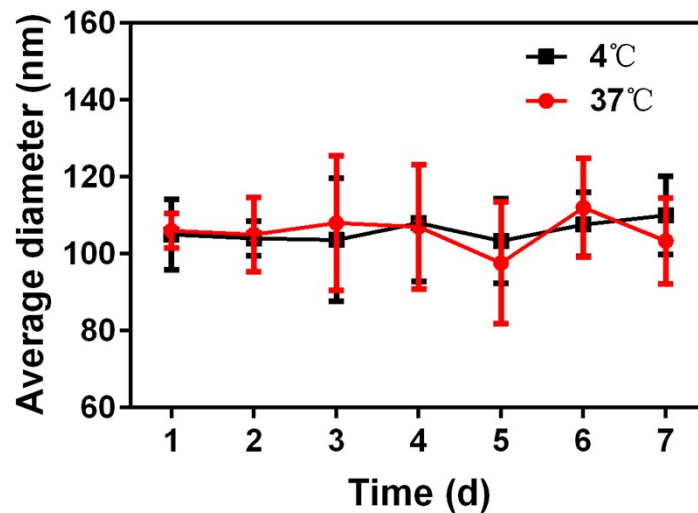

Figure S3. The change in size of SMNC-EXO-PLUSs stored at 4°C and 37°C in serum. Data obtained using dynamic light scattering.

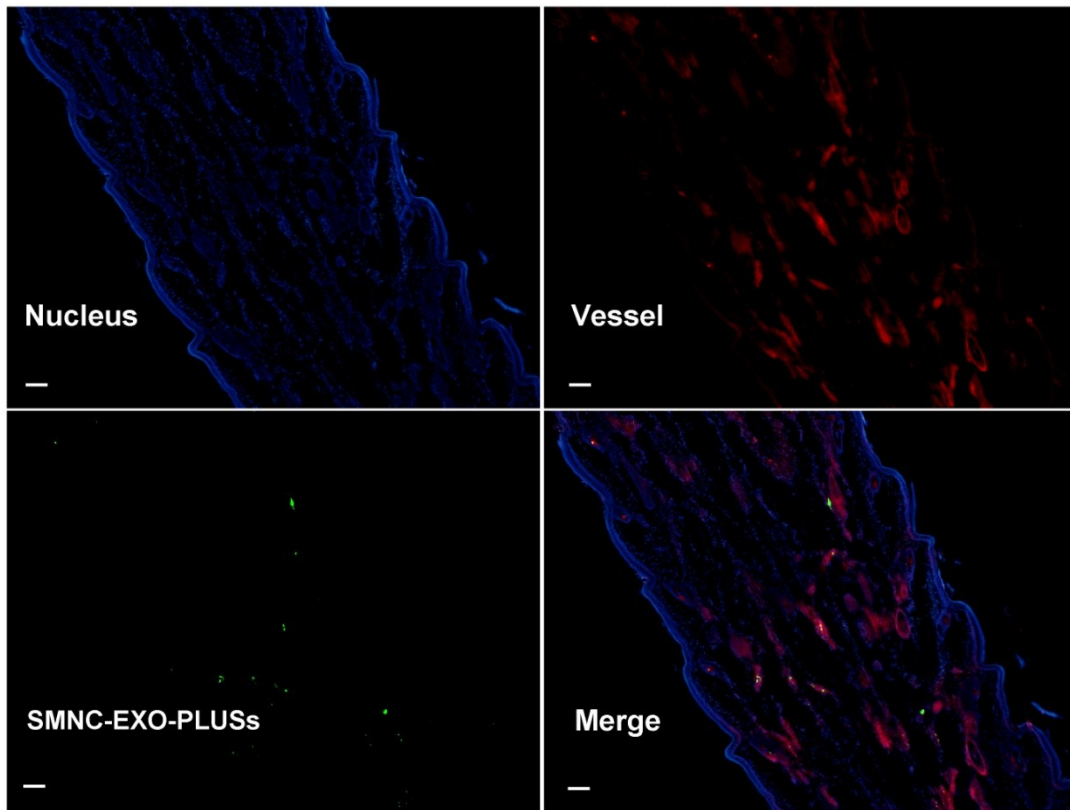

Figure S4. Magnetic retention of SMNC-EXO-PLUSs in blood vessels of mice tail without treatment.

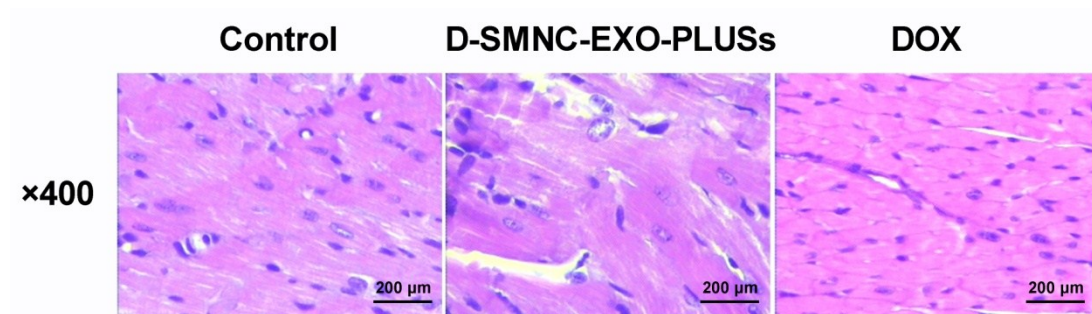

Figure S5. Histological sections of heart stained with hematoxylin and eosin.

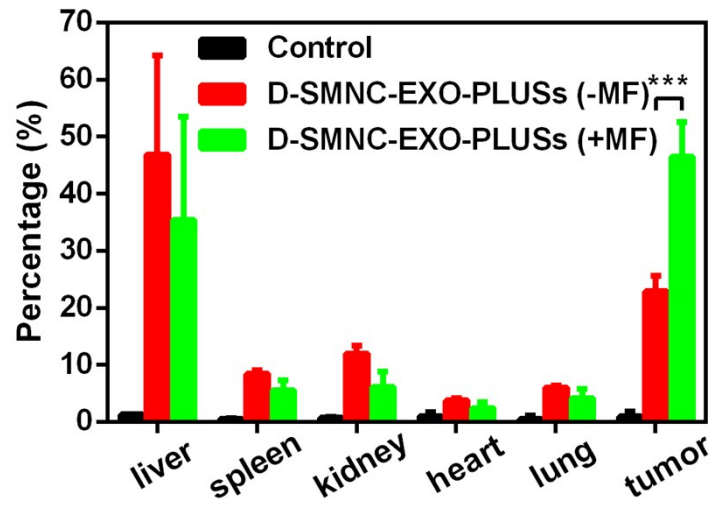

Figure S6. Radiant efficiency of Cy5.5-labeled D-SMNC-EXO-PLUSs in tumors and major organs, significance level is shown as \*\*\* $p < 0.001$ .
